# Supplementary material
Source: PubMed Central journal article supplement (PMC4579457)
Supplement: AEM.01719-15_zam999116633so1.pdf [file AEM.01719-15_zam999116633so1.pdf]

## Plesken et al.: Supplemental data

**A**

| Primer pair             | mrr1-1 | mrr1-2 | BC1G_07159 |
|-------------------------|--------|--------|------------|
| <i>B. pseudocinerea</i> | 200 bp | 144 bp | 112bp      |
| <i>B. cinerea</i> N     | 182 bp | 144 bp | 136 bp     |
| <i>B. cinerea</i> S     | 200 bp | 165 bp | 136 bp     |

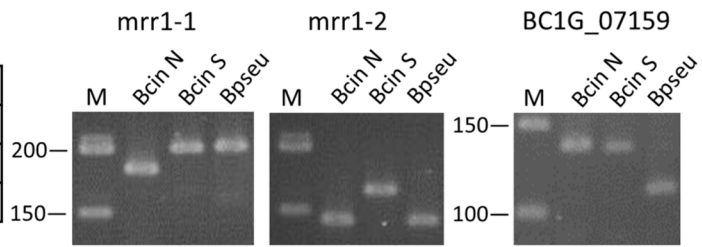

**B**

| Primer pair             | HSP60_fw/HSP60_rev |              |
|-------------------------|--------------------|--------------|
| Restriction digestion   | <i>Bgl</i> III     | <i>Acc</i> I |
| <i>B. pseudocinerea</i> | 1111 bp            | 870 + 241 bp |
| <i>B. cinerea</i> N     | 1111 bp            | 870 + 241 bp |
| <i>B. cinerea</i> S     | 1111 bp            | 870 + 241 bp |
| <i>B. paeoniae</i>      | 830 + 281 bp       | 1111 bp      |

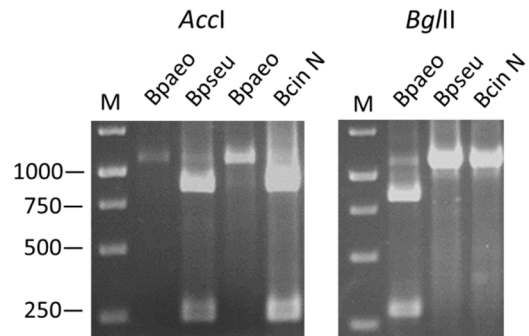

**C**

| Primer pair             | C729_for/ C729_rev |
|-------------------------|--------------------|
| <i>B. pseudocinerea</i> | 728 bp             |
| <i>B. cinerea</i> N     | 728 bp             |
| <i>B. cinerea</i> S     | 728 bp             |
| <i>B. fabae</i>         | 606 bp             |

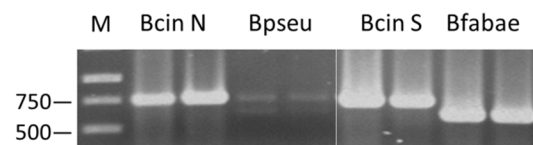

**D**

| Primer pair                  | MS547-685_R/ MS547-201_F |                |
|------------------------------|--------------------------|----------------|
| Restriction digestion        | undigested               | <i>Ear</i> I   |
| <i>B. pseudocin.</i> group A | 484 bp                   | 205+121+158 bp |
| <i>B. pseudocin.</i> group B | 484 bp                   | 326 +158 bp    |

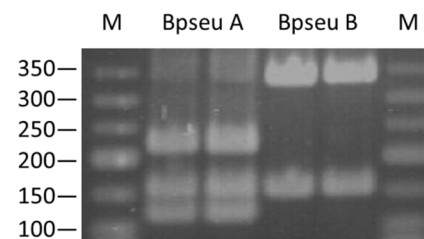

**Fig. S1.** PCR-based differentiation of *B. pseudocinerea* and *B. cinerea* genotypes. On the left side, primer pairs, restriction enzymes (if used), and predicted fragment sizes are indicated. On the right side, the resulting DNA fragments after gel electrophoresis are shown A: Indel PCR for differentiation of *B. cinerea* N, *B. cinerea* S and *B. pseudocinerea*, using primer pairs mrr1-1 (BcinN-in-F/ BcinN-in-R, flanking an 18 bp indel) and mrr1-2 (Mrr1-spez-F/ Mrr1-spez-R, flanking the 21 bp indel) in *mrr1* (Leroch et al., 2013). Identification of *B. pseudocinerea* is preliminary, because the same band sizes are obtained by a rare genotype of *B. cinerea*, referred to as *B. cinerea* X. Final identification of *B. pseudocinerea* is achieved by detection of a 24 bp deletion with primer pair BC1G\_07159 (g2944\_137\_F/ g2944\_273\_R). B: Identification of *B. paeoniae* by PCR-RFLP. *B. paeoniae hsp60* contains a *Bgl*III site that is lacking in *B. pseudocinerea* and *B. cinerea*, and lacks an *Acc*I site that is present in *B.*

*pseudocinerea* and *B. cinerea*. C: Indel PCR for identification of *B. fabae*. *B. fabae* contains a unique 122 bp deletion in a gene corresponding to *B. cinerea* BC1G\_06014 (Rigotti et al., 2002), amplified with primer pair C729\_for/ C719\_rev. With *B. pseudocinerea* strains, only weak duplex bands are obtained. D: PCR-RFLP based differentiation of *B. pseudocinerea* groups A and B. The *ms547* sequence of *B. pseudocinerea* group A contains two EarI site one of which is missing in group B.

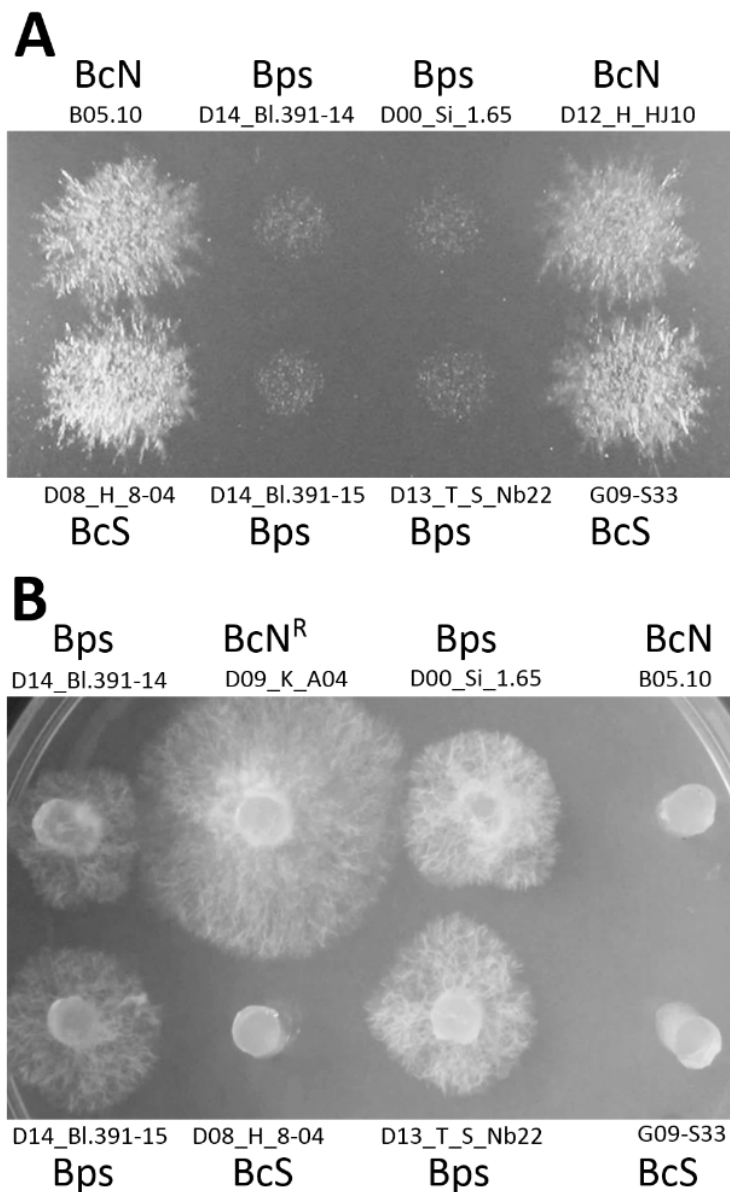

**Fig. S2.** Differentiation of *B. cinerea* and *B. pseudocinerea* by growth tests on 0.5% sucrose agar containing discriminatory fungicide concentrations. A: Agar with 1 mg fenpropidin l<sup>-1</sup>, inoculated with conidia. B: Agar with 5 mg fenhexamid l<sup>-1</sup>, inoculated with agar discs with 24 h old germlings. Pictures were taken 3 days after inoculation. Bps: *B. pseudocinerea* strains; BcN: *B. cinerea* N strains; BcS: *B. cinerea* S strains. BcN<sup>R</sup>: Fenhexamid resistant *B. cinerea* N strain. Strains B05.10, D08\_H\_8-04 and G09-S33 are described in Leroch et al. (2013).

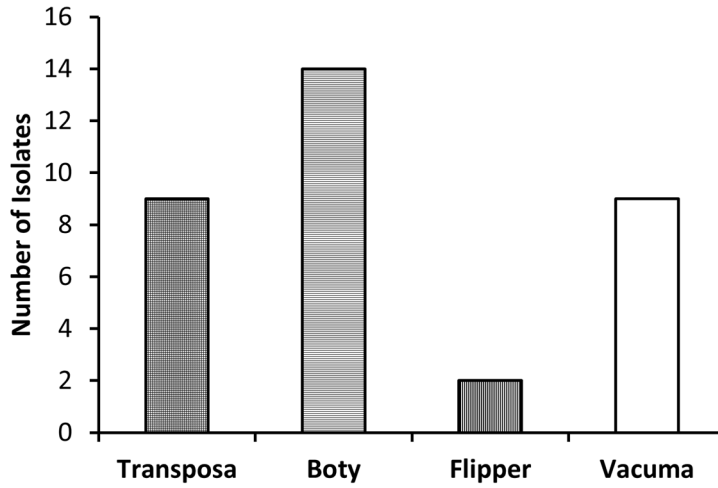

**Fig. S3.** Frequency of occurrence of the transposable elements Boty and Flipper in *B. pseudocinerea*, determined by PCR with Boty- and Flipper-specific primers. Transposa strains contain both elements, Vacuma strains none of these elements.

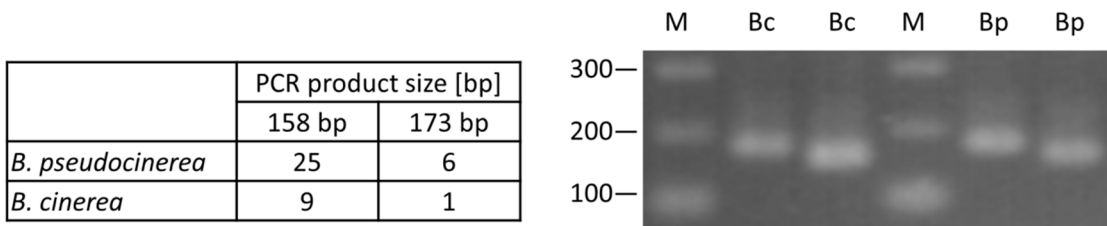

**Fig. S4.** PCR detection of a 15 bp indel in the mitochondrial *rpS3* coding region in strains of *B. pseudocinerea* (Bp) and *B. cinerea* (Bc). Left: Numbers of strains yielding the larger and the smaller PCR product. Right: Ethidium-bromide stained gel with PCR products from strains of both species. Fungal DNA was amplified with primers rps3\_55\_fw/ rps3\_213\_rev.

Table S2: Growth inhibition of *B. pseudocinerea* (Bps) and *B. cinerea* (Bcin) strains by different concentrations of fenpropidin in liquid and on solid medium. SA: Agar containing 0.5% sucrose. The tests were performed twice, with two replicates each. (+) Weak growth.

| Species/ strain         | Growth in liquid medium with fenpropidin (ppm) |      |      |     |     |   |     |   | Growth on SA with 1 mg fenpropidin l <sup>-1</sup> |
|-------------------------|------------------------------------------------|------|------|-----|-----|---|-----|---|----------------------------------------------------|
|                         | 0                                              | 0.01 | 0.03 | 0.1 | 0.3 | 1 | 2   | 4 |                                                    |
| Bps VD110               | +                                              | +    | (+)  | -   | -   | - | -   | - | -                                                  |
| Bps D11_T_B42           | +                                              | +    | -    | -   | -   | - | -   | - | -                                                  |
| Bps D00-Si-1.65         | +                                              | +    | (+)  | -   | -   | - | -   | - | -                                                  |
| Bps D00_RO_1.41         | +                                              | +    | +    | (+) | -   | - | -   | - | -                                                  |
| Bps D97_Ve_1.13         | +                                              | +    | +    | (+) | -   | - | -   | - | -                                                  |
| Bps D12_Gö_1361         | +                                              | +    | -    | -   | -   | - | -   | - | -                                                  |
| Bps D13_K_Mai_Mu14      | +                                              | +    | +    | (+) | -   | - | -   | - | -                                                  |
| Bps D11_T_B41 (group B) | +                                              | +    | +    | +   | -   | - | -   | - | (+)                                                |
| Bcin B05.10             | +                                              | +    | +    | +   | +   | + | (+) | - | +                                                  |
| Bcin G09-S33            | +                                              | +    | +    | +   | +   | + | +   | - | +                                                  |
| Bcin D09_K_A04          | +                                              | +    | +    | +   | +   | + | (+) | - | +                                                  |
| Bcin D08_H_8-07a        | +                                              | +    | +    | +   | +   | + | +   | - | +                                                  |
| Bcin D13_K_S_Ge1        | +                                              | +    | +    | +   | +   | + | (+) | - | +                                                  |

Table S3: Primers used in this study

| Name           | Sequence                                         | Gene                  | Reference                 |
|----------------|--------------------------------------------------|-----------------------|---------------------------|
| BcinN-in-F     | GCGACCTCATCGTTCTTTCAC                            | <i>mrr1</i>           | This work                 |
| BcinN-in-R     | GGCTCTCGATGAGCTGTTTC                             |                       |                           |
| Mrr1-spez-F    | TATCGGTCTTGCAGTCCGC                              | <i>mrr1</i>           | Leroch et al., 2013       |
| Mrr1-spez-R    | TTCCGTACCCCGATCTTCGGAA                           |                       |                           |
| g2944_137_F    | GCAGATGAGGCGGATGATAG                             | BC1G_07159            | This work                 |
| g2944_273_R    | TCCACCCAAGCATCATCTTC                             |                       |                           |
| BC-hch262      | AAGCCCTTCGATGTCTTGGA                             | <i>hch</i>            | Fournier et al., 2005     |
| BC-hch520L     | ACGGATTCCGAACCTAAGTAA                            |                       |                           |
| C729_for       | AGCTCGAGAGAGATCTCTGA                             | BC1G_06014            | (20)<br>(20)              |
| C729_rev       | CTGCAATGTTCTGCGTGAA                              |                       |                           |
| PIRA-fw-P225L  | CGAATGTATTCTCTGCGCATGCTGCTCGACATCTTGTC           | <i>sdhB</i>           | This work                 |
| PIRA-rev-P225L | GCAAGCCATCTGTAACCTCTG                            |                       |                           |
| Bc_Tub_for     | AAGATCCGCGAGGAGTTCCC                             | <i>tubA</i>           | This work                 |
| Bc_Tub_rev     | GCGGTTTGGACGTTGTTAG                              |                       |                           |
| 155_betaTub_F  | CAACCTTCAAATGCGTGAG                              | <i>tubA</i>           | Fournier et al., 2005     |
| 1174_betaTub_R | AGATGGGTTGCTGAGCTTCA                             |                       |                           |
| PIRA-Tub1      | GCCTCGTTATCGATACAGAAGATC                         | <i>tubA</i>           | This work                 |
| PIRA-Tub2      | TATGATGGCTACCTTCTCCGTC                           |                       |                           |
| Bc-Boty1       | CTTTACCGGAACACAAGCCAT                            | <i>Boty pol</i>       | Kretschmer and Hahn, 2008 |
| Bc-Boty2       | GGTCTTCCATTCTTCGCCTTC                            |                       |                           |
| F300           | GCACAAAACCTACAGAAGA                              | Flipper               | Levis et al., 1997        |
| F1550          | ATTCGTTTCTTGACTGTA                               |                       |                           |
| Qo13ext        | GGTATAACCCGACGGGGTTATAGAATAG                     | <i>cytB</i>           | Leroux et al., 2010       |
| Qo14ext        | AACCATCTCCATCCACCATACCTACAAA                     |                       |                           |
| mito_55_fw     | TTGCTCAGGGCTCCGGTAAC                             | <i>rps3</i> (mitoch.) | This work                 |
| mito_213_rev   | GCTGGTCCAGAGTGTAAGG                              |                       |                           |
| HSP60_fw       | CAACAATTGAGATTGCCCACAAG                          | <i>hsp60</i>          | Staats et al., 2005       |
| HSP60_rev      | GATGGATCCAGTGGTACCGAGCAT                         |                       |                           |
| G3PDH_fw       | ATTGACATCGTCCGTGTCAACGA                          | <i>g3pdh</i>          | Staats et al., 2005       |
| G3PDH_rev      | ACCCCACTCGTTGTCTGATACCA                          |                       |                           |
| MS547-F        | AAGGAGGACGTTGGAAGGAT                             | <i>ms547</i>          | Walker et al., 2011       |
| MS547-R        | AAGTCCAGAATCTCGATGTATTTGT                        |                       |                           |
| ms547_685_R    | GTCGATAGATGGGCTGCAAG                             | <i>ms547</i>          | This work                 |
| ms547_201_F    | GTTGGTGGAGGTAGGAAGAC                             |                       |                           |
| Mat1-F         | GTGACCAGGAAACAGCTATGACCGGAGTGTGTTGATCGTGGAGCCGAG | (MAT1-1)              | Amselem et al., 2011      |
| Mat1-R         | GTGACTGTAAAACGACGGCCAGTCCACACATACATCATGACGGCTCCC | (MAT1-2)              |                           |

## References

- Amselem J, Cuomo CA, van Kann JAL, Viaud M, Benito EP, Couloux A, et al.** 2011. Genomic analysis of the necrotrophic fungal pathogens *Sclerotinia sclerotiorum* and *Botrytis cinerea*. *PLoS Genet* **7**: e1002230.
- Fournier E, Giraud T, Albertini C, Brygoo Y.** 2005. Partition of the *Botrytis cinerea* complex in France using multiple gene genealogies. *Mycologia* **97**:1251–1267.
- Kretschmer M., Hahn M.** 2008. Fungicide resistance and genetic diversity of *Botrytis cinerea* isolates from a vineyard in Germany. *J Plant Dis Prot* **115**:214–219.
- Leroch M, Plesken C, Weber RWS, Kauff F, Scalliet G, Hahn M.** 2013. Gray mold populations in German strawberry fields are resistant to multiple fungicides and dominated by a novel clade closely related to *Botrytis cinerea*. *Appl Environ Microbiol* **79**:159–167.
- Leroux P, Gredt M, Leroch M, Walker AS.** 2010. Exploring mechanisms of resistance to respiratory inhibitors in field strains of *Botrytis cinerea*, the causal agent of gray mold. *Appl Environ Microbiol* **76**:6615-6630.
- Levis C, Fortini D, Brygoo Y.** 1997. Flipper, a mobile Fot1-like transposable element in *Botrytis cinerea*. *Mol Gen Genet* **254**:674-680
- Muñoz G, Hinrichsen P, Brygoo Y, Giraud T.** 2002. Genetic characterization of *Botrytis cinerea* populations in Chile. *Mycol Res* **106**:594-601.
- Rigotti R, Gindro L, Richter H, Viret O.** 2002. Characterization of molecular markers for specific and sensitive detection of *Botrytis cinerea* Pers.: Fr. in strawberry (*Fragaria×ananassa* Duch.) using PCR. *FEMS Microbiol Lett* **209**:169-174.
- Staats M, van Baarlen P, van Kan JAL.** 2005. Molecular phylogeny of the plant pathogenic genus *Botrytis* and the evolution of host specificity. *Mol Biol Evol* **22**:333-346.
- Walker AS, Gautier AL, Confais J, Martinho D, Viaud M, Le Pêcheur P, Dupont J, Fournier E.** 2011. *Botrytis pseudocinerea*, a new cryptic species causing grey mould in French vineyards in sympatry with *Botrytis cinerea*. *Phytopathology* **101**:1433-1445.
